# Supplementary material
Source: PubMed Central journal article supplement (PMC6866259)
Supplement: HBM-39-1489-s001.pdf [file HBM-39-1489-s001.pdf]

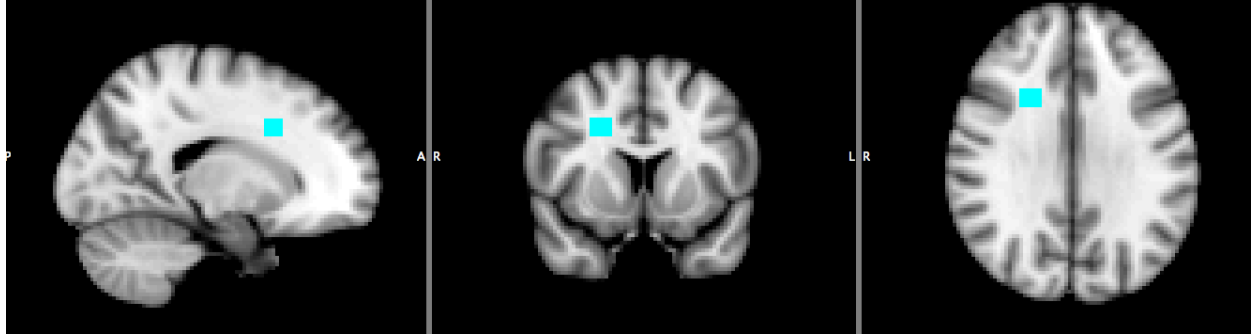

**Supplementary Figure 1.** From left to right; sagittal, coronal, and axial views of the mask used in MNI space at  $x = 36$ ,  $y = 68$  and  $z = 51$  to extract FA, MD, RD, and AD values.
