# Supplementary material
Source: PubMed Central journal article supplement (PMC6866259)
Supplement: HBM-39-1489-s002.pdf [file HBM-39-1489-s002.pdf]

**A*****N*-acetyl aspartate In-Season**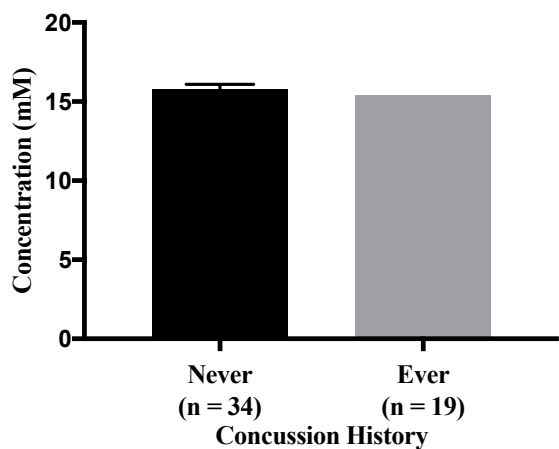**B****Glutamine In-Season**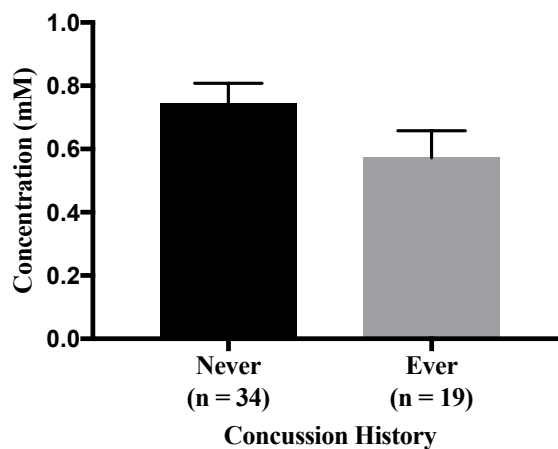**C****Fractional Anisotropy In-Season**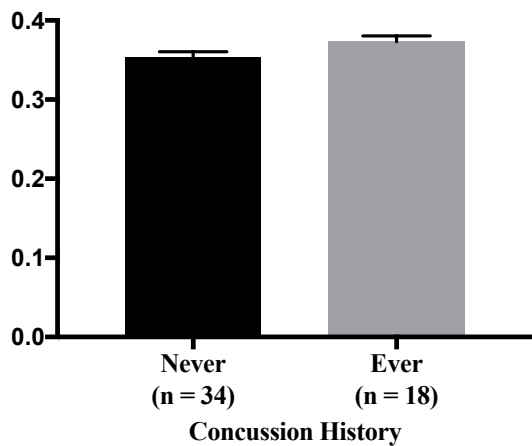**D****Radial Diffusivity In-Season**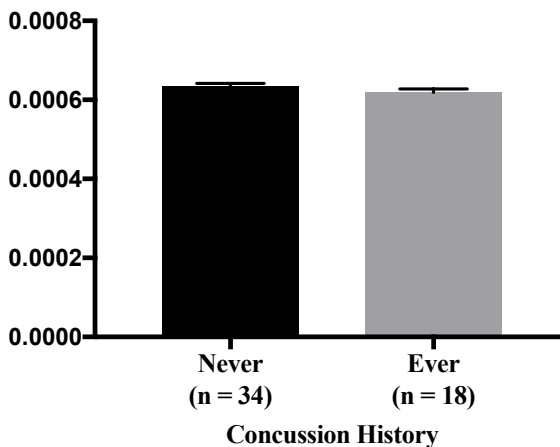**Supplementary Figure 2.**

(A) *N*-acetyl aspartate ( $P=0.47$ ) and (B) glutamine ( $P=0.11$ ), (C) fractional anisotropy ( $P=0.07$ ), and (D) radial diffusivity ( $P=0.18$ ) of Never concussed and Ever concussed players at the in-season time point. Standard error of the mean (SEM) is represented by vertical bars.
