# Supplementary material
Source: PubMed Central journal article supplement (PMC6866259)
Supplement: HBM-39-1489-s003.pdf [file HBM-39-1489-s003.pdf]

### SCAT3 Symptom Score

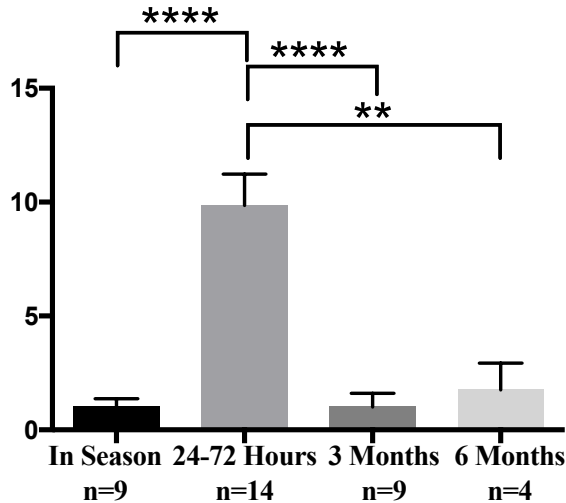

### SCAT3 Symptom Severity Score

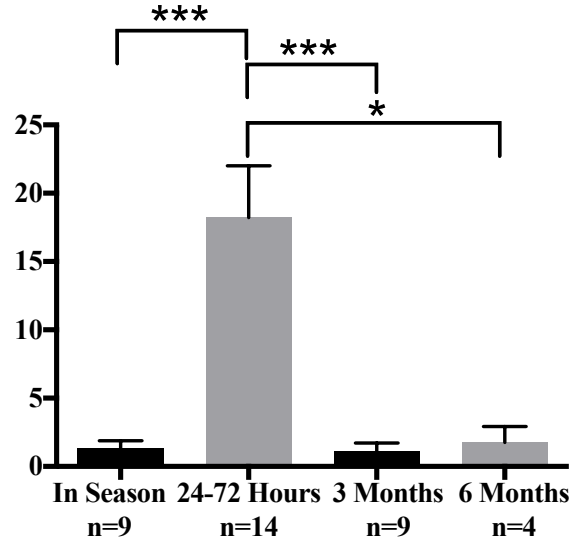

### Supplementary Figure 3.

Bar graphs showing the mean SCAT3 Symptom Score and SCAT3 Symptom Severity Score in the concussed group. Standard error of the mean (SEM) is represented by vertical bars. The mean SCAT3 Symptom Score (A) significantly increased ( $F=17.6$ ,  $P<0.0001$ ) post-concussion ( $P<0.0001$ ), then recovered from post-concussion by 3 ( $P<0.0001$ ) and 6 ( $P=0.002$ ) months. The mean SCAT3 Symptom Severity Score (B) significantly increased ( $F=9.7$ ,  $P=0.0001$ ) post-concussion ( $P=0.0008$ ), then recovered from post-concussion by 3 ( $P=0.0007$ ) and 6 ( $P=0.02$ ) months.
