# Supplementary material
Source: PubMed Central journal article supplement (PMC6866259)
Supplement: HBM-39-1489-s004.pdf [file HBM-39-1489-s004.pdf]

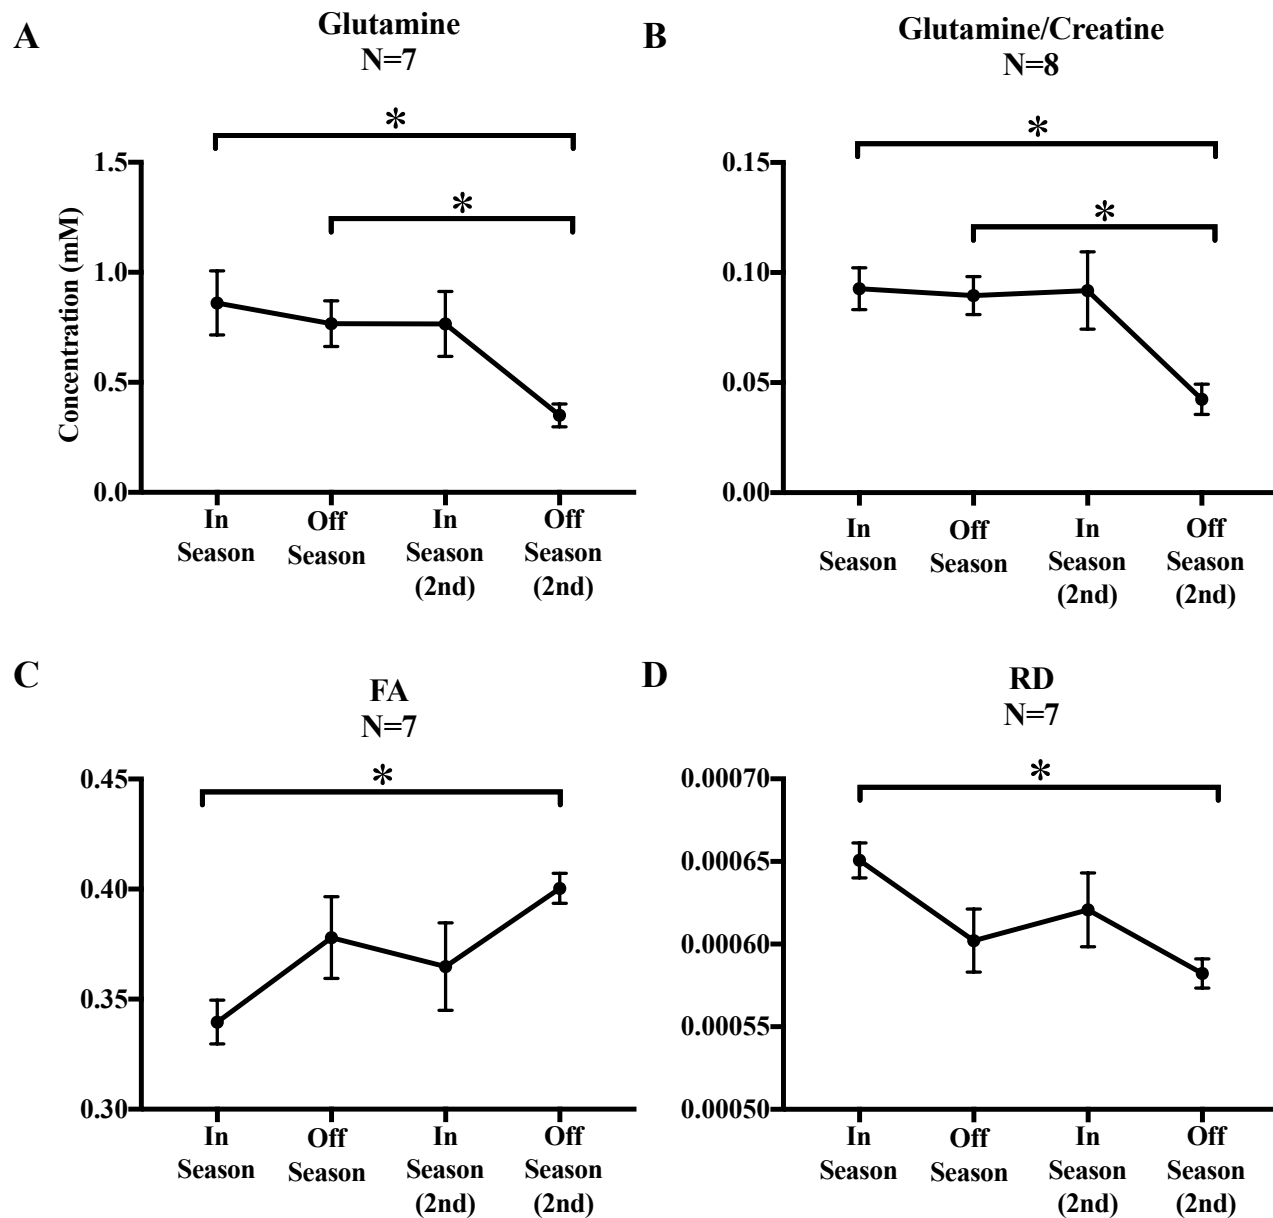

#### Supplementary Figure 4.

Line graphs showing the mean concentration of Glutamine (Gln) and Glutamine/Creatine (Gln/Cr), and Fractional Anisotropy (FA) and Radial Diffusivity (RD) in the same non-concussed (N=7) athletes playing two consecutive seasons (Except Gln/Cr, N=8). Standard error of the mean (SEM) is represented by vertical bars. Mean Gln levels (A) decreased ( $F=4.7$ ,  $P=0.047$ ) by 60% from the first in season to the second off season ( $P=0.03$ ), and by 54% from the first off season to the second off season ( $P=0.02$ ). Mean Gln/Cr levels (B) decreased ( $F=4.8$ ,  $P=0.04$ ) by 54% from the first in season to the second off season ( $P=0.02$ ), and from the first off season to the second off season ( $P=0.02$ ). The mean FA value (C) changed over time ( $F=6.4$ ,  $P=0.02$ ), with an increase between the first in season and second off season ( $P=0.006$ ), and the mean RD value (D) changed over time ( $F=5.1$ ,  $P=0.04$ ), with a decrease between the first in season and second off season ( $P=0.015$ ).
