# Supplementary material
Source: PubMed Central journal article supplement (PMC6866259)
Supplement: HBM-39-1489-s005.pdf [file HBM-39-1489-s005.pdf]

Supplementary Table 1. Rugby Timeline of Concussed Athletes

|          | Athlete 1                                                                            | Athlete 2                             | Athlete 3               | Athlete 4                             | Athlete 5                      | Athlete 6                             | Athlete 7                             | Athlete 8         | Athlete 9         | Athlete 10                   | Athlete 11        | Athlete 12 | Athlete 13        | Athlete 14        | Athlete 15        |
|----------|--------------------------------------------------------------------------------------|---------------------------------------|-------------------------|---------------------------------------|--------------------------------|---------------------------------------|---------------------------------------|-------------------|-------------------|------------------------------|-------------------|------------|-------------------|-------------------|-------------------|
| Season 1 | August<br>September<br>October                                                       | <i>In Season</i><br><i>Concussion</i> | <i>Concussion</i>       | In Season                             | In Season                      | In Season                             | In Season                             |                   |                   |                              |                   |            |                   |                   |                   |
|          | November<br>December<br>January<br>February<br>March<br>April<br>May<br>June<br>July | <i>3 Month</i>                        | <i>3 Month</i>          |                                       |                                |                                       |                                       |                   |                   |                              |                   |            |                   |                   |                   |
|          |                                                                                      |                                       | <i>Off Season</i>       |                                       | Off Season                     | Off Season                            |                                       |                   |                   |                              |                   |            |                   |                   |                   |
|          |                                                                                      |                                       |                         | Off Season                            |                                |                                       |                                       |                   |                   |                              |                   |            |                   |                   |                   |
|          |                                                                                      | 6 Month<br>Concussion                 | <i>Concussion</i>       |                                       |                                |                                       |                                       |                   |                   |                              |                   |            |                   |                   |                   |
| Season 2 | August<br>September<br>October                                                       |                                       | Concussion              | <i>In Season</i><br><i>Concussion</i> | <i>In Season</i><br>Concussion | <i>In Season</i><br><i>Concussion</i> | <i>In Season</i><br><i>Concussion</i> | <i>Concussion</i> |                   |                              |                   |            |                   |                   |                   |
|          | November<br>December<br>January<br>February<br>March<br>April<br>May<br>June<br>July |                                       | 3 Month                 | <i>3 Month</i>                        | <i>3 Month</i>                 | <i>3 Month</i>                        | <i>3 Month</i>                        | <i>3 Month</i>    | <i>3 Month</i>    |                              |                   |            |                   |                   |                   |
|          |                                                                                      |                                       | 6 Month                 |                                       |                                |                                       |                                       |                   |                   |                              |                   |            |                   |                   |                   |
|          |                                                                                      |                                       | 6 Month                 | <i>6 Month</i>                        | <i>6 Month</i>                 | <i>6 Month</i>                        | <i>6 Month</i>                        | <i>6 Month</i>    |                   |                              |                   |            |                   |                   |                   |
| Season 3 | August<br>September<br>October                                                       |                                       | In Season<br>Concussion | In Season                             |                                |                                       |                                       | In Season         |                   | In Season                    | <i>Concussion</i> |            |                   |                   |                   |
|          | November<br>December<br>January<br>February<br>March<br>April<br>May<br>June<br>July |                                       | 3 Month                 |                                       |                                |                                       |                                       |                   | <i>Concussion</i> | <i>3 Month</i><br>Concussion |                   |            |                   |                   |                   |
|          |                                                                                      |                                       | 6 Month                 |                                       |                                |                                       |                                       |                   |                   | 3 Month                      | 3 Month           |            |                   |                   |                   |
| Season 4 | August<br>September<br>October                                                       |                                       |                         |                                       |                                |                                       |                                       |                   | 6 Month           |                              |                   |            | <i>Concussion</i> | <i>Concussion</i> | <i>Concussion</i> |
|          | November<br>December<br>January<br>February<br>March<br>April                        |                                       |                         |                                       |                                |                                       |                                       |                   |                   |                              |                   |            |                   |                   |                   |
|          |                                                                                      |                                       |                         |                                       |                                |                                       |                                       |                   |                   |                              | <i>3 Month</i>    |            |                   | <i>3 Month</i>    | <i>3 Month</i>    |
|          |                                                                                      |                                       |                         |                                       |                                |                                       |                                       |                   |                   |                              |                   |            |                   | <i>6 Month</i>    | <i>6 Month</i>    |

*In Season, Off Season, Concussion, 3 Month, 6 Month*; Data used in analysis
